# Supplementary material for: Enhanced Identification of Key Bacterial Motility Genes via a Cross-Species Genomic Hybrid Feature Machine Learning Approach
Source: Research Square preprint supplement (doi:10.21203/rs.3.rs-8719280/v1), 2026-02-09
Supplement: Supplementary file 1 [file 014c837292cca9b008a36bc2.xlsx]

## Sheet: Table S1
Table S1 Top 100 key motility-related domains identified by the Protein Domain Matrix model.
Domain	Nomotile	Motile	MeanDecreaseAccuracy	MeanDecreaseGini
Flg_bbr_C	0.00712646	0.00866689	0.00789021	10.9573
Flagellin_N	0.00639982	0.00841804	0.00738807	8.13762
Flg_bb_rod	0.00819574	0.00810437	0.00815478	9.75312
FHIPEP	0.00718042	0.00768307	0.00739955	9.17052
FliMN_C	0.00625368	0.00689245	0.00658215	8.24819
Flagellin_C	0.0070332	0.0068478	0.00695705	8.41699
FliG_N	0.00589171	0.00668575	0.00629262	6.72501
FliG_C	0.00495543	0.00643559	0.00569878	7.65713
FliE	0.00777105	0.00607101	0.00691946	9.53968
Bac_export_3	0.00653359	0.00574678	0.00612713	8.95757
FliG_M	0.00669478	0.00534495	0.0059687	6.8208
FliS	0.00606988	0.00494431	0.00551116	6.0045
Flg_hook	0.00668387	0.00467393	0.00564579	8.85122
FliP	0.00510422	0.00453582	0.00480758	6.53573
FliM	0.00657079	0.00445644	0.00549332	6.99352
Bac_export_1	0.00604866	0.00442455	0.00525383	5.41341
YscJ_FliF_C	0.00639221	0.00434308	0.00537768	6.84613
Bac_export_2	0.00486298	0.00431263	0.00458647	6.6067
YscJ_FliF	0.00701591	0.00427073	0.00564168	8.49074
MotB_plug	0.0057318	0.00422354	0.00498353	6.27268
FliL	0.00563237	0.00396715	0.00478694	6.29584
FlgD	0.00657466	0.00389549	0.00521701	6.80194
FliJ	0.00373023	0.00367221	0.00369941	4.99065
MCPsignal	0.00770907	0.00349543	0.0056231	5.90998
T3SS_ATPase_C	0.00469398	0.00317199	0.00391814	7.1015
FliD_N	0.00371675	0.0027297	0.00321533	2.96641
HAMP	0.00145915	0.00265805	0.00206416	2.7682
FliD_C	0.00620153	0.00265595	0.00442393	4.13092
FliH	0.00400431	0.00254227	0.00326631	4.92278
FlgH	0.00207983	0.00239141	0.0022381	2.22308
MotA_ExbB	0.00261487	0.00231722	0.00246511	4.00797
ChapFlgA	0.00039041	0.00215707	0.00127882	1.91976
ATP.synt_ab	0.000590448	0.00204939	0.00132795	2.52045
GGDEF	0.00103945	0.00202349	0.00152532	2.44536
EAL	0.000882439	0.00201321	0.00144545	2.9816
FlgI	0.00114128	0.00195822	0.0015543	1.8497
CheW	0.000302877	0.00184935	0.00107038	2.49287
dCache_1	0.00129291	0.00175932	0.00152816	3.53059
Rod.binding	0.00269391	0.00172546	0.00221754	1.99157
Hpt	0.00172344	0.00169327	0.00171965	3.95057
PilZ	0.00297641	0.00168866	0.00233458	3.30395
OmpA	0.00435204	0.00159694	0.00297001	3.93614
HTH_8	0.000828698	0.00150442	0.00116968	1.74276
ATP.synt_I	0.000340756	0.00147565	0.000900134	1.72603
FliO	0.00338285	0.00137782	0.00237682	2.62067
H.kinase_dim	0.00474663	0.00132219	0.00303062	5.57523
FlaE	0.00206742	0.00124467	0.00166091	2.00866
FlgM	0.00170692	0.00122338	0.00146745	1.92209
CheR_N	0.00308246	0.00122115	0.00216607	4.5777
FLgD_tudor	0.00156637	0.00121932	0.0014018	1.78999
HflK_N	0.000162938	0.00116651	0.000659279	0.608584
FlgN	0.00432422	0.00113114	0.00270217	2.9674
SpoVR	0.00119626	0.00108699	0.00113625	2.90783
ATP.synt_DE	0.000298531	0.00106808	0.000687458	0.845771
DsbB	0.000353721	0.000945641	0.000649829	2.34282
X4HB_MCP_1	0.00357027	0.000944872	0.00226566	3.25136
CheZ	0.000493492	0.000934197	0.000719101	0.90721
HDOD	0.00221337	0.00090124	0.00155434	2.12313
FtsJ	0.000527399	0.000880474	0.000702667	1.68796
SRP54	0.00138439	0.000866344	0.00112922	2.68116
AAA_PrkA	0.000913803	0.000860311	0.000884111	2.08158
Sdh5	0.000117549	0.000837954	0.000475003	0.726289
PASTA	0.000196237	0.000836854	0.000512012	0.808169
DUF188	0.000997419	0.00081178	0.000906979	2.72205
HD_5	0.000134947	0.000805356	0.000469189	1.28993
DUF444	0.000977859	0.000786241	0.000881613	2.50417
Response_reg	0.000353319	0.000771045	0.000564071	0.785138
GST_N_3	0.000241821	0.000766744	0.000505499	0.901205
PBP5_C	0.000956629	0.000751153	0.000846184	1.88842
FlgD_ig	0.000408926	0.000746015	0.00057222	0.846572
AMIN	0.000202881	0.000735534	0.000467988	0.976354
HATPase_c	0.000174853	0.000729179	0.000449472	0.621088
DUF2911	-1.03e-05	0.000724704	0.000358538	0.25436
Sigma54_CBD	0.000496152	0.000714673	0.000603862	0.573705
YicC_N	0.000290639	0.000712797	0.000501852	0.528911
X3D	0.000509751	0.000707454	0.000609327	1.34651
PAS	0.000402825	0.000706866	0.000558755	1.01359
Hfq	0.000188548	0.000706041	0.000445193	1.46503
SPOR	0.00106481	0.000700658	0.00087567	1.44161
Pkinase	6.55e-05	0.000690652	0.000380174	0.401545
p450	6.92e-05	0.000677765	0.000374165	0.418347
SspB	0.00100721	0.000676025	0.000838213	0.862845
DUF3046	0.000141401	0.000671712	0.00040718	0.764611
N_methyl	0.000619164	0.000654599	0.00063348	1.52011
ACR_tran	0.000796008	0.000643933	0.000713674	1.14927
Sigma70_r3	0.000170265	0.000641926	0.000403408	0.411139
FlaG	0.00400462	0.000634916	0.00230582	3.74825
MlaC	0.00039494	0.000632883	0.000506421	0.78376
DUF2723	3.54e-05	0.000619393	0.000327725	0.219601
LptD	0.000199393	0.000603246	0.000402733	0.574312
Ni_hydr_CYTB	0.001221	0.000594031	0.000902664	0.966255
ATE_N	0.000844953	0.000592092	0.000720379	0.78148
F420H2_quin_red	-1.48e-05	0.000577787	0.000281063	0.252463
CarbopepD_reg_2	5.08e-05	0.000571543	0.000306439	0.364502
GIDA_assoc	4.92e-06	0.000565667	0.000288719	0.226103
PAS_3	0.000492915	0.000564038	0.000525085	0.817337
Glyoxalase_6	0.000186294	0.000562187	0.000374416	0.265644
CsrA	0.00162483	0.000556447	0.00109636	2.02739
Toprim_C_rpt	0.000195115	0.000551068	0.000374819	0.317685
TSP_3	1.27e-05	0.000543712	0.000277379	0.505666
