# Supplementary material for: Enhanced Identification of Key Bacterial Motility Genes via a Cross-Species Genomic Hybrid Feature Machine Learning Approach
Source: Research Square preprint supplement (doi:10.21203/rs.3.rs-8719280/v1), 2026-02-09
Supplement: Supplementary file 2 [file 364dbb3da162a3dda1de5a3d.xlsx]

## Sheet: Table S2 
Table S2 E. coli BL21(DE3) gene names and protein IDs corresponding to the top 100 key motility domains from the Protein Domain Matrix model.
Domain	Genes	Protein id	Domain	Genes	Protein id
Flg_bb_rod	flgK	WP_000096480.1	FlgD	flgD	WP_000020467.1
	flgF	WP_000349316.1	FlgD_ig	flgD	WP_000020467.1
	flgG	WP_000625837.1	FLgD	flgD	WP_000020467.1
	flgB	WP_000884692.1	FlgH	flgH	WP_001295442.1
	flgE	WP_000885878.1	FlgI	flgI	WP_095140333.1
	flgC	WP_001196460.1	FlgM	flgM	WP_000020880.1
Flg_bbr_C	flgK	WP_000096480.1	ATP-synt_ab	atpD	WP_000190506.1
	flgF	WP_000349316.1		atpA	WP_001176745.1
	flgG	WP_000625837.1		rho	WP_012767773.1
	flgE	WP_000885878.1	Hpt	barA	WP_000186439.1
	flgC	WP_001196460.1		cheA	WP_000355058.1
MCP signal	aer	WP_000094721.1		torS	WP_000505117.1
	tap	WP_000483187.1		evgS	WP_001326970.1
	tar	WP_001297437.1	CxxCxxCC	yeiW	WP_000389030.1
	tsr	WP_000919572.1		ykgJ	WP_001303809.1
CheW	cheW	WP_000147302.1		ycgN	WP_012767724.1
	cheA	WP_000355058.1	PAS	glnL	WP_000190577.1
EAL	pdeC	WP_000019548.1		atoS	WP_000559135.1
	dgcE	WP_000043781.1		dhaR	WP_001295618.1
	pdeN	WP_000470561.1		phoR	WP_152951405.1
	pdeF	WP_000772722.1	CheZ	cheZ	WP_000983609.1
	pdeR	WP_000859981.1	CsrA	csrA	WP_000906486.1
	pdeB	WP_000961225.1	FHIPEP	flhA	WP_000066978.1
	pdeG	WP_001246510.1	FlaE	flgE	WP_000885878.1
	hmsP	WP_001266293.1	Flagellin_N	flgL	WP_001212776.1
	pdeH	WP_001295219.1	PilZ	bcsA	WP_000025892.1
	pdeD	WP_001295494.1		ycgR	WP_152913890.1
	pdeL	WP_001301264.1	Bac_export_2	flhB	WP_152912955.1
	pdeA	WP_001301424.1	ChapFlgA	flgA	WP_000905458.1
	bluF	WP_001353798.1	CheB_methylest	cheB	WP_000036371.1
	dosP	WP_012304876.1	CheR_N	cheR	WP_000204338.1
GGDEF	dgcE	WP_000043781.1	ACR_tran	mdtF	WP_000024872.1
	dgcI	WP_000086904.1		cusA	WP_000573928.1
	dgcT	WP_000409883.1		acrB	WP_001132469.1
	dosC	WP_000426272.1		mdtB	WP_001197904.1
	adrA	WP_000484048.1		acrD	WP_001273151.1
	dgcZ	WP_000592802.1		mdtC	WP_152858656.1
	cdgI	WP_000616417.1	AMIN	amiC	WP_000016907.1
	dgcJ	WP_000766131.1	FtsJ	rlmM	WP_001045520.1
	pdeR	WP_000859981.1	GIDA_assoc	mnmG	WP_000499751.1
	dgcN	WP_000969010.1	Glucosaminidase	flgJ	WP_001295441.1
	hmsP	WP_001266293.1		bax	WP_001297957.1
	dgcM	WP_001301114.1	GST_N_3	yibF	WP_000779792.1
	dosP	WP_012304876.1		gstB	WP_001295292.1
Hfq	hfq	WP_001051883.1	MotA_ExbB	exbB	WP_001314160.1
Response_reg	cheB	WP_000036371.1	Sigma54_activat	norR	WP_000010749.1
	narL	WP_000070491.1		atoC	WP_000125282.1
	atoC	WP_000125282.1		ygeV	WP_000417806.1
	dpiA	WP_000126500.1		prpR	WP_000941027.1
	baeR	WP_000137877.1		rtcR	WP_001232881.1
	zraR	WP_000148551.1		hyfR	WP_001251526.1
	barA	WP_000186439.1		glrR	WP_001295369.1
	rssB	WP_000193447.1		dhaR	WP_001295618.1
	torS	WP_000505117.1		tyrR	WP_001300658.1
	btsR	WP_000598641.1		pspF	WP_001301108.1
	dcuR	WP_000611288.1		flhA	WP_001301332.1
	uhpA	WP_000633668.1		glnG	WP_001329395.1
	basR	WP_000697915.1	Sigma70_r3	rpoS	WP_000081550.1
	cheY	WP_000763867.1		rpoD	WP_000437375.1
	cusR	WP_000770941.1	SPOR	damX	WP_000343193.1
	fimZ	WP_000805422.1		rlpA	WP_001231428.1
	rcsC	WP_000876025.1	SpoVR	ycgB	WP_000190854.1
	evgA	WP_000991370.1	SRP54	ffh	WP_000460035.1
HATPase_c	gyrB	WP_000072067.1		ftsY	WP_001040664.1
	barA	WP_000186439.1	TusA	tusA	WP_000130621.1
	glnL	WP_000190577.1		tsuB	WP_000985273.1
	parE	WP_000195296.1	YicC_N	yicC	WP_000621336.1
	cusS	WP_000253837.1	DsbB	dsbB	WP_000943459.1
	cheA	WP_000355058.1	DUF188	yaiI	WP_000158159.1
	torS	WP_000505117.1	DUF444	yeaH	WP_000219686.1
	atoS	WP_000559135.1	Ni_hydr_CYTB	yceJ	WP_000011114.1
	cpxA	WP_000580413.1		fdnI	WP_000045648.1
	qseC	WP_000673402.1		fdoI	WP_000829013.1
PAS_9	dgcE	WP_000043781.1		ydhU	WP_001069979.1
	pdeR	WP_000859981.1		yodB	WP_001079074.1
	dosP	WP_012304876.1		hyaC	WP_001186424.1
N_methyl	ppdD	WP_000360904.1	HAMP	barA	WP_000186439.1
	gspI	WP_000820109.1		cusS	WP_000253837.1
	ppdA	WP_000857056.1		tap	WP_000483187.1
	gspG	WP_001087296.1		torS	WP_000505117.1
	ppdB	WP_001144297.1		cpxA	WP_000580413.1
	ppdC	WP_001276460.1		baeS	WP_000675150.1
HTH_8	atoC	WP_000125282.1		rstB	WP_000732510.1
	zraR	WP_000148551.1		narX	WP_000918073.1
	ygeV	WP_000417806.1		envZ	WP_001253686.1
	prpR	WP_000941027.1		hmsP	WP_001266293.1
	dhaR	WP_001295618.1		tar	WP_001297437.1
	pspF	WP_001301108.1		narQ	WP_152912790.1
	glnG	WP_001329395.1	HflK_N	hflK	WP_000312488.1
MotB_plug	motB	WP_000795630.1	LptD	lptD	WP_000746151.1
