# Supplementary material for: Enhanced Identification of Key Bacterial Motility Genes via a Cross-Species Genomic Hybrid Feature Machine Learning Approach
Source: Research Square preprint supplement (doi:10.21203/rs.3.rs-8719280/v1), 2026-02-09
Supplement: Supplementary file 3 [file 58fae4c5a5e43c04f9ba3c2f.xlsx]

## Sheet: Table S6
Table S6 Statistics on the number of exercise-related genes in Gene-Domain Hybrid Matrix model with different sample sizes.
Number of samples	2000	1000	500	250	125	64	32	16
All rankings are of bacterial flagellar motility–related genes and domains.	50	40	28	22	11	9	5	5
Number of motility-related genes and domains among the top 100 features	58	53	43	27	19	18	15	17
The furthest rank at which motility-related genes and domains appear in the feature importance table	24866	27505	26256	24141	21536	19210	18893	17872
Total number of genes and domains in each model matrix	29379	27611	26256	24142	21537	19212	18899	17889
