# Supplementary material for: Enhanced Identification of Key Bacterial Motility Genes via a Cross-Species Genomic Hybrid Feature Machine Learning Approach
Source: Research Square preprint supplement (doi:10.21203/rs.3.rs-8719280/v1), 2026-02-09
Supplement: Supplementary file 4 [file 72f9efddea2b3d9346fbc7cd.xlsx]

## Sheet: Table S5
Table S5 Performance evaluation of the Gene-Domain Hybrid Matrix model under progressively reduced genomic dataset sizes.
Number of test set samples	500	250	124	62	32	16	8	4
Accuracy(%)	88.44	85.6	79.03	85.61	87.5	74.85	75	75
Kappa	0.77	0.71	0.58	0.71	0.75	0.52	0.5	0.5
Motile_Recall(%)	87.4	86.4	77.42	80.65	87.5	87.5	55.75	50
Nonmotile_Recall(%)	89.48	84.8	80.64	93.55	87.5	62.5	94.15	100
