# Supplementary material for: Enhanced Identification of Key Bacterial Motility Genes via a Cross-Species Genomic Hybrid Feature Machine Learning Approach
Source: Research Square preprint supplement (doi:10.21203/rs.3.rs-8719280/v1), 2026-02-09
Supplement: Supplementary file 5 [file 76fad10ebf34368abc41081a.docx]

**Figure. S1**





**Fig. S1.** Distribution of feature protein domains in Motile and Nomotile bacteria.

Note: This heatmap illustrates the relative abundances of the top 100 feature protein domains across 40 representative bacterial strains, including 20 Motile and 20 Nomotile bacteria randomly selected. Rows represent bacterial strains, grouped according to motility phenotype. Columns represent protein domains and are hierarchically clustered based on their abundance patterns. The color scale indicates relative domain abundance, ranging from red (high) through yellow to blue (low). Escherichia coli is highlighted as a reference control for motile bacteria.
