# Supplementary material for: Enhanced Identification of Key Bacterial Motility Genes via a Cross-Species Genomic Hybrid Feature Machine Learning Approach
Source: Research Square preprint supplement (doi:10.21203/rs.3.rs-8719280/v1), 2026-02-09
Supplement: Supplementary file 6 [file 7b0b5fba8bc1545073364898.xlsx]

## Sheet: Table S3
Table S3: Prediction results of test set Gene Frequency Matrix model.
Number of test set samples	500	250	124	64	32	16	8	4
Accuracy(%)	88.41	85.6	82.26	83.87	84.75	81.25	75	70
Kappa	0.77	0.71	0.65	0.68	0.69	0.62	0.5	0.4
Motile_Recall(%)	87.38	86.4	80.64	74.19	81.25	75	50	70
Nonmotile_Recall(%)	89.43	84.8	83.87	93.55	88.24	87.5	100	70
