# Supplementary material for: Enhanced Identification of Key Bacterial Motility Genes via a Cross-Species Genomic Hybrid Feature Machine Learning Approach
Source: Research Square preprint supplement (doi:10.21203/rs.3.rs-8719280/v1), 2026-02-09
Supplement: Supplementary file 7 [file 8f47dc9614e232032bef0cd1.xlsx]

## Sheet: Table S4
Table S4 Statistics on the number of exercise-related genes in Gene Frequency Matrix model with different sample sizes.
Number of samples	2000	1000	500	250	125	64	32	16
All rankings are of bacterial flagellar motility–related genes and domains.	41	37	22	15	11	10	5	5
Number of motility-related genes and domains among the top 100 features	49	51	40	29	24	21	23	25
The furthest rank at which motility-related genes and domains appear in the feature importance table	19731	18598	17916	16488	14795	13287	11927	10038
Total number of genes and domains in each model matrix	19740	18599	17918	16508	14802	13326	11956	10105
