# Supplementary material for: Enhanced Identification of Key Bacterial Motility Genes via a Cross-Species Genomic Hybrid Feature Machine Learning Approach
Source: Research Square preprint supplement (doi:10.21203/rs.3.rs-8719280/v1), 2026-02-09
Supplement: Supplementary file 8 [file aa35ceef6204bffa113a2d23.xlsx]

## Sheet: Table S7
Table S7 Classification performance of different feature-based models on test datasets.
Metrics	Protein Domain Matrix model	Gene Frequency Matrix model	Gene-Domain Hybrid Matrix model
Accuracy(%)	87.12	88.41	88.44
Kappa	0.74	0.77	0.77
Motile_Recall(%)	89.83	87.38	87.4
Nonmotile_Recall(%)	84.41	89.43	89.48
